# Supplementary material for: Mycosporine-like Amino Acids in Palmaria palmata (Rhodophyta): Specific Implication of Usujirene in Photoprotection
Source: MDPI journal article supplement (doi:10.3390/md22030121), 2024-03-05
Supplement: s1 [file s1]

| Variables |                         |                 | Factors               |                    |                 |                 |               |                 |           |
|-----------|-------------------------|-----------------|-----------------------|--------------------|-----------------|-----------------|---------------|-----------------|-----------|
|           |                         |                 | Time                  | Nutrients          | Light           | Interactions    |               |                 |           |
|           |                         |                 |                       |                    |                 | T x N           | T x L         | N x L           | T x N x L |
| MAAs      | Shinorine               | F               | 87.052                | 5.771              | 3.009           | 0.808           | 0.280         | 2.925           | 0.456     |
|           |                         | <i>p</i> -value | < <b>2.00e-16 ***</b> | <b>0.006 **</b>    | 0.090           | 0.528           | 0.757         | 0.065           | 0.768     |
|           | Palythine               | F               | 11.016                | 4.716              | 0.085           | 0.488           | 0.003         | 0.958           | 0.567     |
|           |                         | <i>p</i> -value | <b>1.95e-05 ***</b>   | <b>0.0143 *</b>    | 0.772           | 0.7443          | 0.997         | 0.392           | 0.688     |
|           | Asterina-330            | F               | 9.217                 | 6.947              | 0.067           | 5.184           | 0.398         | 5.281           | 0.433     |
|           |                         | <i>p</i> -value | <b>8.78e-05 ***</b>   | <b>0.003 **</b>    | 0.797           | <b>0.002 **</b> | 0.674         | <b>0.009 **</b> | 0.784     |
|           | Porphyra-334            | F               | 46.312                | 5.324              | 6.559           | 2.309           | 0.796         | 1.834           | 0.231     |
|           |                         | <i>p</i> -value | <b>3.13e-13 ***</b>   | <b>0.009 **</b>    | <b>0.0142 *</b> | 0.0741          | 0.458         | 0.173           | 0.920     |
|           | Palythinol              | F               | 6.051                 | 2.786              | 1.282           | 1.319           | 0.43          | 1.100           | 0.176     |
|           |                         | <i>p</i> -value | <b>0.002 **</b>       | 0.073              | 0.264           | 0.279           | 0.653         | 0.343           | 0.949     |
|           | Unknown_356             | F               | 10.788                | 0.041              | 10.732          | 1.656           | 0.148         | 0.928           | 2.128     |
|           |                         | <i>p</i> -value | <b>2.35e-05 ***</b>   | 0.960              | <b>0.002 **</b> | 0.179           | 0.863         | 0.403           | 0.095     |
|           | Usurijene               | F               | 1.820                 | 0.459              | 7.508           | 0.121           | 0.181         | 2.658           | 0.325     |
|           |                         | <i>p</i> -value | 0.159                 | 0.635              | <b>0.009 **</b> | 0.974           | 0.835         | 0.082           | 0.859     |
|           | Palythene               | F               | 12.418                | 0.157              | 0.426           | 0.803           | 0.099         | 0.526           | 0.111     |
|           |                         | <i>p</i> -value | <b>6.47e-06 ***</b>   | 0.855              | 0.518           | 0.530           | 0.906         | 0.595           | 0.978     |
|           | SUM MAAs                | F               | 34.713                | 5.595              | 0.211           | 1.984           | 0.300         | 1.153           | 0.243     |
|           |                         | <i>p</i> -value | <b>2.47e-11 ***</b>   | <b>0.007 **</b>    | 0.649           | 0.115           | 0.743         | 0.326           | 0.912     |
| Pigments  | Chlorophyll- <i>a</i>   | F               | 48.333                | 14.180             | 1.732           | 2.511           | 0.284         | 3.296           | 0.300     |
|           |                         | <i>p</i> -value | <b>6.36e-11***</b>    | <b>2.87e-05***</b> | 0.196           | 0.059           | 0.754         | <b>0.049*</b>   | 0.876     |
|           | Lutein                  | F               | 25.380                | 8.115              | 7.107           | 3.329           | 0.910         | 1.128           | 2.248     |
|           |                         | <i>p</i> -value | <b>1.33e-07***</b>    | <b>0.001**</b>     | <b>0.011*</b>   | <b>0.020*</b>   | 0.412         | 0.335           | 0.083     |
|           | α-carotene              | F               | 30.036                | 0.157              | 0.007           | 0.999           | 0.645         | 4.845           | 0.832     |
|           |                         | <i>p</i> -value | <b>2.12e-08***</b>    | 0.855              | 0.933           | 0.421           | 0.531         | 0.014           | 0.514     |
|           | β-carotene              | F               | 0.625                 | 1.245              | 5.740           | 1.210           | 0.355         | 3.597           | 0.550     |
|           |                         | <i>p</i> -value | 0.541                 | 0.300              | <b>0.022*</b>   | 0.324           | 0.704         | 0.038           | 0.700     |
|           | <i>r</i> -phycoerythrin | F               | 23.261                | 52.802             | 0.364           | 3.261           | 3.815         | 10.920          | 0.589     |
|           |                         | <i>p</i> -value | <b>3.28e-07***</b>    | <b>1.97e-11***</b> | 0.550           | <b>0.022*</b>   | <b>0.031*</b> | <b>0.000***</b> | 0.672     |
|           | <i>r</i> -phycocyanin   | F               | 26.581                | 34.135             | 1.053           | 1.280           | 4.238         | 4.257           | 0.144     |
|           |                         | <i>p</i> -value | <b>8.13e-08***</b>    | <b>4.86e-09***</b> | 0.312           | 0.296           | <b>0.022*</b> | <b>0.022*</b>   | 0.965     |
|           | SUM pigments            | F               | 55.535                | 52.649             | 0.154           | 4.412           | 2.656         | 9.308           | 0.489     |
|           |                         | <i>p</i> -value | <b>9.95e-12***</b>    | <b>2.05e-11***</b> | 0.697           | <b>0.005**</b>  | 0.084         | <b>0.001***</b> | 0.744     |

Significant *p*-values are indicated in bold and stars according to the following levels:

\* (*p*-value ≤ 0.05); \*\* (*p*-value ≤ 0.01); \*\*\* (*p*-value ≤ 0.001)
